# Supplementary material
Source: PubMed Central journal article supplement (PMC6125546)
Supplement: zac009187459s1.pdf [file zac009187459s1.pdf]

1 **Table S1:** MICs of AS-48 and lysozyme of NTM and *M. tuberculosis* clinical strains

| <b>Strain</b>                      | <b>MIC AS48<br/>(µg/ml)</b> | <b>MIC lysozyme<br/>(µg/ml)</b> | <b>Source or reference</b> |
|------------------------------------|-----------------------------|---------------------------------|----------------------------|
| <i>M. fortuitum</i> <sup>a</sup>   | 64                          | >1200-1200                      | HCU                        |
| <i>M. mucogenicum</i> <sup>a</sup> | 64                          | 200-400                         | HCU                        |
| <i>M. xenopi</i>                   | <2                          | < 9.375                         | HCU                        |
| <i>M. goodsonae</i>                | <2                          | <9.375                          | HCU                        |
| <i>M. avium</i> <sup>a</sup>       | 64                          | >1200                           | HCU                        |
| <i>M. abscessus</i> <sup>a</sup>   | 64                          | >1200                           | HCU                        |
| <i>M. lentiflavum</i>              | > 256                       | >1200                           | HCU                        |
| <b>HMS 1500</b>                    | 32                          | 100-200                         | HMS                        |
| <b>HMS 1555</b>                    | 32                          | >400                            | HMS                        |
| <b>HMS 1531</b>                    | 8                           | 50-100                          | HMS                        |
| <b>HMS 1536</b>                    | 32                          | 200-400                         | HMS                        |
| <b>HMS 1546</b>                    | 32                          | 100                             | HMS                        |
| <b>HMS 1547</b>                    | 32                          | 200                             | HMS                        |
| <b>HMS 1548</b>                    | 32                          | 400                             | HMS                        |
| <b>HMS 1292</b>                    | 32                          | 100-200                         | HMS                        |
| <b>HMS 1543</b>                    | >32                         | >400                            | HMS                        |
| <b>HMS 1278</b>                    | 32                          | 200                             | HMS                        |

2 <sup>a</sup>= fast growing strains, the rest of the strains have a slow growth. HCU= Clinical isolates

3 provided by the Hospital Clínico Universitario Lozano Blesa, Zaragoza. HMS= Clinical isolates

4 provided by Hospital Miguel Servet, Zaragoza.

5
